# Supplementary material for: Periodic Mesoporous Organosilica Functionalized with Sulfonic Acid Groups as Acid Catalyst for Glycerol Acetylation
Source: Materials (Basel). 2013 Aug 16;6(8):3556–70. doi: 10.3390/ma6083556 (PMC5521322; doi:10.3390/ma6083556)

Article

## Supporting Information

**Figure S1.** Raman spectrum of EP and EP-(CH<sub>2</sub>)<sub>3</sub>-SO<sub>3</sub>H. The highlighted area shows the signals of the sulfonic acid group.

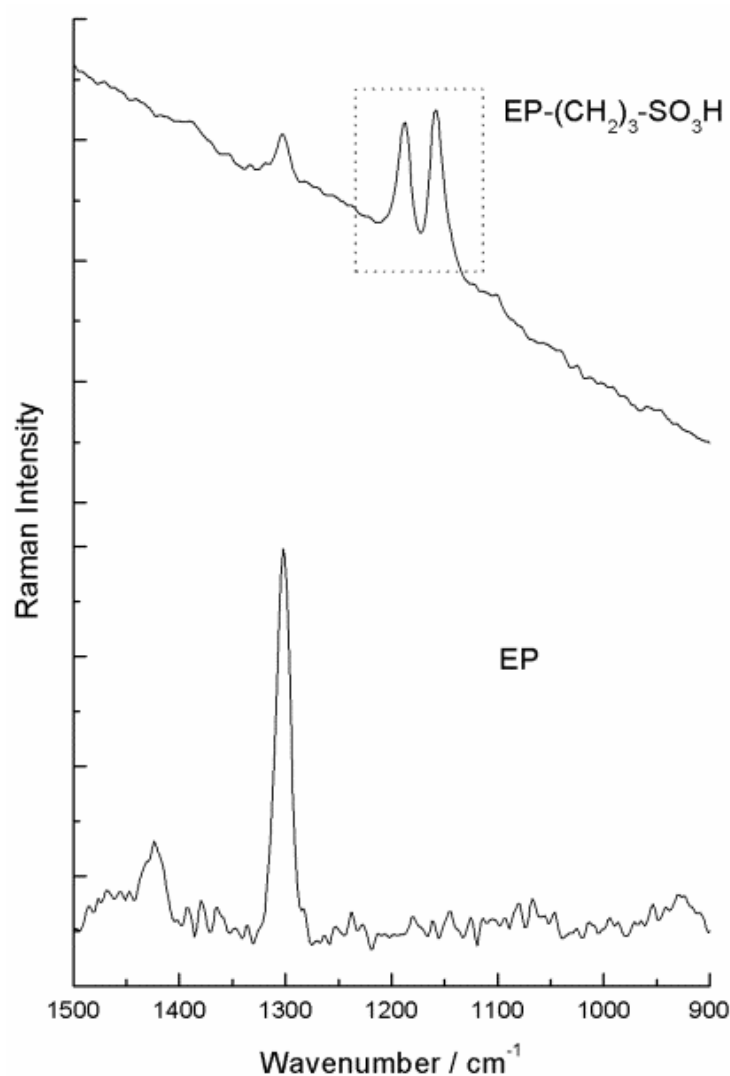

Supplement: Supplementary File 1 [file materials-06-03556-s001.pdf]
